# Supplementary material for: Intraventricular Hemorrhage and Survival, Multimorbidity, and Neurodevelopment
Source: PubMed Central journal article supplement (PMC11704976; doi:10.1001/jamanetworkopen.2024.52883), 2025-01-06
Supplement: jamanetwopen-e2452883-s001.pdf [file jamanetwopen-e2452883-s001.pdf]

## Supplemental Online Content

Rees P, Gale C, Battersby C, Williams C, Carter B, Sutcliffe A. Intraventricular hemorrhage and survival, multimorbidity, and neurodevelopment. *JAMA Netw Open*. 2025;8(1):e2452883. doi:10.1001/jamanetworkopen.2024.52883

**eTable 1.** Definitions of Comorbidities

**eTable 2.** Outcome Definitions

**eFigure 1.** Directed Acyclic Graph for Causal Pathway Between IVH and Death or Neurodevelopmental Impairment

**eFigure 2.** Directed Acyclic Graph of Causal Pathways for Missing Outcome Data

**eTable 3.** Missing Data for Cases and Control by Outcome

**eTable 4.** Survival Without Severe Neurodevelopmental Impairment by Each Grade of IVH and Laterality of Injury

**eTable 5.** Survival Without Severe Neurodevelopmental Impairment by Each Week of Gestation After High-Grade IVH

**eTable 6.** Table Illustrating the Prevalence of Multimorbidity for Those With High and Low-Grade IVH Compared to Controls

**eFigure 3.** Graph Illustrating the Proportion of Infants Surviving Without Severe Neurodevelopmental Impairment by Increasing Morbidity Count

**eTable 7.** Estimated Risk of Survival Without Severe Neurodevelopmental Impairment Under Different Missing at Random (MAR) and Missing Not at Random (MNAR) Scenarios

**eTable 8.** Absolute Imputed Risk of Survival Without Severe Neurodevelopmental Impairment Under Missing At Random (MAR) Assumption and a Moderate Missing Not at Random (MNAR) Scenario

This supplemental material has been provided by the authors to give readers additional information about their work.

| eTable 1: definitions of additional morbidities |                                                                                                                                                                    |
|-------------------------------------------------|--------------------------------------------------------------------------------------------------------------------------------------------------------------------|
| Morbidity                                       | Definition                                                                                                                                                         |
| Bronchopulmonary dysplasia                      | Receipt of respiratory support at 36 weeks corrected gestational age.                                                                                              |
| Severe retinopathy of prematurity               | Bilateral or unilateral retinopathy of prematurity grade 4, 5 or aggressive posterior.                                                                             |
| Surgical necrotizing enterocolitis              | Receipt of surgical treatment for necrotizing enterocolitis (on daily data).                                                                                       |
| Culture-positive sepsis                         | Confirmed gram positive sepsis, gram negative sepsis, bacterial meningitis or fungal infection on daily data (at any point) or a positive blood or CSF culture.    |
| Major surgery                                   | Any major surgery (on daily data) defined as entry into any body cavity, or any surgery with a large volume of anticipated blood loss relative to the infant size. |

eTable 2: Functional outcomes assessed and the corresponding developmental domains (\* considered a severe neurodevelopmental impairment)<sup>27</sup>

| <u>Domain</u>            | <u>Questions</u>                                                                |
|--------------------------|---------------------------------------------------------------------------------|
| Developmental delay      | Is the child's development between 3-6 months behind corrected age?             |
|                          | Is the child's development between 6-12 months behind corrected age?            |
|                          | *Is the child's development more than 12 months behind corrected age?           |
| Receptive communication  | Does this child have difficulty with understanding outside of familiar context? |
|                          | *Is this child unable to understand words or signs?                             |
| Expressive communication | Does this child have any difficulty with communication?                         |
|                          | Does this child have difficulty with speech (<10 words/signs)?                  |
|                          | *Does the child have <5 meaningful words, vocalization or signs?                |
| Gross motor              | Does this child have any difficulty walking?                                    |
|                          | Is this child's gait non-fluent or abnormal reducing mobility?                  |
|                          | *Is this child unable to walk without assistance?                               |
|                          | Is this child unstable or needs to be supported when sitting?                   |
|                          | *Is this child unable to sit?                                                   |
| Fine motor               | Does this child have any difficulty with the use of one hand?                   |
|                          | Does this child have difficulty with the use of both hands?                     |
|                          | *Is this child unable to use hands (i.e. to feed)?                              |
| Vision                   | Does this child have any visual problems (including squint)?                    |
|                          | Does this child have a visual defect that is not fully correctable?             |
|                          | *Is this child blind or sees only light?                                        |
| Hearing                  | Does this child have a hearing impairment?                                      |
|                          | Does this child have a hearing impairment corrected by aids?                    |
|                          | *Does this child have hearing impairment not correctable with aids?             |

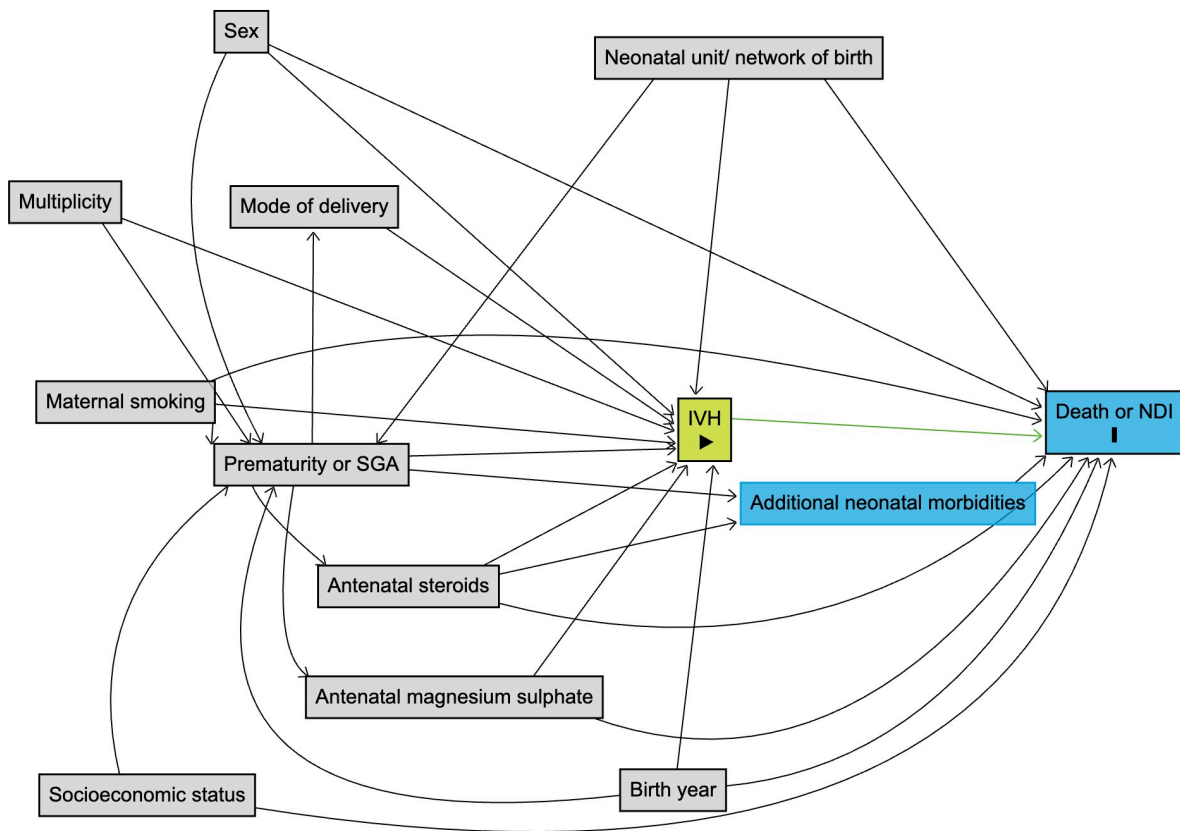

eFigure 1: Directed acyclic graph illustrating assumed causal relationship between intraventricular hemorrhage and death or neurodevelopmental impairment. Additional neonatal morbidities include retinopathy of prematurity, necrotizing enterocolitis, bronchopulmonary dysplasia, and neonatal sepsis.

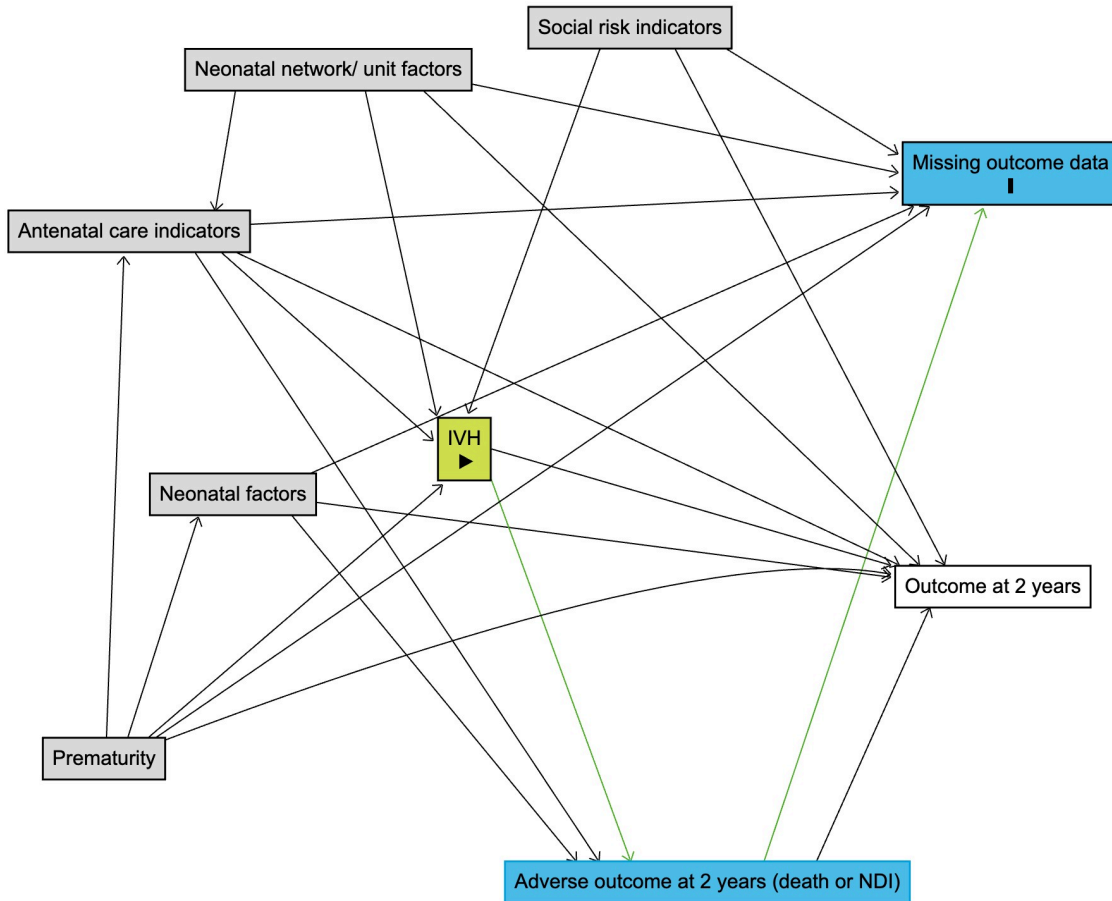

eFigure 2: Directed acyclic graph depicting the assumptions made about the mechanisms of missingness for 2-year outcome data. Antenatal care indicators included administration of magnesium sulphate, antenatal steroids and mode of delivery. Neonatal factors included sex, bronchopulmonary dysplasia, retinopathy of prematurity, necrotizing enterocolitis, major surgery, sepsis, and multiplicity. Social risk indicators included number of previous pregnancies, maternal age, maternal ethnicity, smoking in pregnancy, receipt of breast milk at discharge and index of median deprivation. Neonatal network/ unit factors included the admitting neonatal network, the number of neonatal unit admissions per infant (i.e. transfers), and level of discharging neonatal unit.

| eTable 3: Missing data for cases and controls by outcome |                        |                             |                 |                             |                      |                             |                 |                             |
|----------------------------------------------------------|------------------------|-----------------------------|-----------------|-----------------------------|----------------------|-----------------------------|-----------------|-----------------------------|
| Outcome                                                  | High-grade IVH, n (%)  | Missing outcome data, n (%) | Controls, n (%) | Missing outcome data, n (%) | Low-grade IVH, n (%) | Missing outcome data, n (%) | Controls, n (%) | Missing outcome data, n (%) |
| Survival without severe NDI                              | 670 (30.28)            | 596 (21.22)                 | 979 (56.56)     | 777 (30.98)                 | 2,507 (63.09)        | 1,539 (27.89)               | 2,161 (63.08)   | 1,601 (31.85)               |
| Outcomes for survivors                                   |                        |                             |                 |                             |                      |                             |                 |                             |
| Severe NDI                                               | 523 (43.84)            | 596 (33.31)                 | 246 (20.08)     | 777 (38.81)                 | 737 (22.72)          | 1,545 (32.26)               | 509 (19.06)     | 1,601 (37.49)               |
| Overall development                                      |                        |                             |                 |                             |                      |                             |                 |                             |
| Any delay                                                | 662 (57.27)            | 633 (35.38)                 | 385 (32.06)     | 801 (40.01)                 | 1,135 (35.12)        | 1,557 (32.51)               | 852 (32.01)     | 1,609 (37.67)               |
| Communication                                            |                        |                             |                 |                             |                      |                             |                 |                             |
| Any difficulty with communication                        | 563 (48.79)            | 635 (35.49)                 | 430 (36.13)     | 812 (40.56)                 | 1,099 (34.87)        | 1,637 (34.18)               | 849 (33.02)     | 1,700 (39.80)               |
| Difficulty with speech (<10 words or signs)              | 522 (45.51)            | 642 (35.89)                 | 395 (33.33)     | 817 (40.81)                 | 1,037 (33.05)        | 1,651 (34.47)               | 757 (29.7)      | 1,722 (40.32)               |
| Difficulty understanding outside of familiar context     | 196 (17.71)            | 682 (38.12)                 | 107 (9.28)      | 849 (42.41)                 | 302 (9.81)           | 1,709 (35.69)               | 212 (8.49)      | 1,775 (41.56)               |
| Has <5 meaningful words, vocalizations or signs          | 334 (29.20)            | 645 (36.05)                 | 204 (17.42)     | 831 (41.51)                 | 549 (17.60)          | 1,669 (34.85)               | 378 (14.85)     | 1,726 (40.41)               |
| Unable to understand words or signs                      | 124 (11.26)            | 688 (38.46)                 | 51 (4.41)       | 846 (42.26)                 | 177 (5.75)           | 1,711 (35.73)               | 104 (4.16)      | 1,773 (41.51)               |
| Motor                                                    |                        |                             |                 |                             |                      |                             |                 |                             |
| Any difficulty walking                                   | 521 (44.19)            | 610 (34.10)                 | 123 (10.17)     | 792 (39.56)                 | 406 (12.66)          | 1,583 (33.05)               | 291 (11.02)     | 1,630 (38.16)               |
| Unable to walk without assistance                        | 341 (29.25)            | 623 (34.82)                 | 65 (5.40)       | 798 (39.86)                 | 256 (8.01)           | 1,593 (33.26)               | 152 (5.78)      | 1,642 (38.45)               |
| Non-fluent or abnormal gait reducing mobility            | 488 (41.85)            | 623 (34.82)                 | 110 (9.14)      | 798 (39.86)                 | 372 (11.65)          | 1,596 (33.33)               | 259 (9.84)      | 1,638 (38.35)               |
| Difficulty with the use of both hands                    | 118 (10.23)            | 635 (35.49)                 | 16 (1.34)       | 806 (40.26)                 | 72 (2.26)            | 1,609 (33.60)               | 39 (1.50)       | 1,676 (39.24)               |
| Difficulty with using one hand                           | 293 (25.37)            | 634 (35.44)                 | 24 (2.01)       | 810 (40.46)                 | 90 (2.84)            | 1,619 (33.81)               | 63 (2.42)       | 1,673 (39.17)               |
| Unstable or needs support sitting                        | 146 (12.58)            | 628 (35.10)                 | 15 (1.25)       | 804 (40.16)                 | 91 (2.86)            | 1,610 (33.62)               | 46 (1.76)       | 1,664 (38.96)               |
| Unable to sit                                            | 93 (7.96)              | 620 (34.66)                 | 11 (0.92)       | 801 (40.01)                 | 56 (1.76)            | 1,604 (33.49)               | 22 (0.84)       | 1,659 (38.84)               |
| Unable to use hands e.g. to feed                         | 126 (11.01)            | 645 (36.05)                 | 16 (1.35)       | 814 (40.66)                 | 89 (2.83)            | 1,643 (34.31)               | 55 (2.13)       | 1,693 (39.64)               |
| Vision                                                   |                        |                             |                 |                             |                      |                             |                 |                             |
| Any vision problems including squint                     | 352 (19.68)<br>(30.99) | 653 (36.5)                  | 138 (6.89)      | 827 (41.31)                 | 404 (12.98)          | 1,677 (35.02)               | 238 (9.34)      | 1,724 (40.37)               |
| A not fully correctable visual defect                    | 116 (10.4)             | 702 (39.24)                 | 27 (2.3)        | 849 (42.41)                 | 63 (2.07)            | 1,743 (36.40)               | 35 (1.40)       | 1,765<br>(41.33)            |
| Complete blindness or able to see light only             | 26 (2.33)              | 673 (37.62)                 | 0 (0) (0)       | 834 (41.66)                 | 11 (0.36)            | 1,704 (35.58)               | 6 (0.24)        | 1,749 (40.95)               |
| Hearing                                                  |                        |                             |                 |                             |                      |                             |                 |                             |
| A hearing impairment                                     | 94 (8.37)              | 666 (37.23)                 | 43 (3.72)       | 845 (42.21)                 | 126 (4.08)           | 1,703 (35.56)               | 119 (4.72)      | 1,750 (40.97)               |
| Hearing impairment correctable with aids                 | 29 (2.61)              | 678 (37.90)                 | 20 (1.73)       | 843 (42.11)                 | 47 (1.52)            | 1,697 (35.44)               | 58 (2.29)       | 1,742 (40.79)               |
| Hearing impairment not correctable with aids             | 23 (2.07)              | 679 (37.95)                 | 6 (0.52)        | 849 (42.41)                 | 21 (0.68)            | 1,720 (35.92)               | 23 (0.91)       | 1,752 (41.02)               |

| eTable 4: Survival without severe neurodevelopmental impairment (NDI) and any NDI in survivors by each grade of IVH and laterality/extent of injury (adjusted covariates as per the low and high-grade IVH models; predictors of missingness also as per high and low-grade IVH models) |                   |                     |                                        |                                           |                             |
|-----------------------------------------------------------------------------------------------------------------------------------------------------------------------------------------------------------------------------------------------------------------------------------------|-------------------|---------------------|----------------------------------------|-------------------------------------------|-----------------------------|
| Outcome                                                                                                                                                                                                                                                                                 | Crude OR (95%CI)  | Adjusted OR (95%CI) | Absolute imputed risk for cases, n (%) | Absolute imputed risk for controls, n (%) | Imputed adjusted OR (95%CI) |
| <b>IVH grade 1 vs. matched controls</b>                                                                                                                                                                                                                                                 |                   |                     |                                        |                                           |                             |
| Survival without severe NDI                                                                                                                                                                                                                                                             | 1.13 (0.98, 1.30) | 1.05 (0.89, 1.25)   | 1,741 (68.96)                          | 1,492 (66.95)                             | 1.04 (0.88, 1.22)           |
| Any NDI in survivors                                                                                                                                                                                                                                                                    | 1.01 (0.88, 1.17) | 1.01 (0.86, 1.20)   | 967 (43.48)                            | 820 (43.36)                               | 1.02 (0.87, 1.19)           |
| <b>IVH grade2 vs. matched controls</b>                                                                                                                                                                                                                                                  |                   |                     |                                        |                                           |                             |
| Survival without severe NDI                                                                                                                                                                                                                                                             | 0.89 (0.78, 1.02) | 0.76 (0.65, 0.90)   | 1,567 (59.70)                          | 1,409 (63.33)                             | 0.75 (0.64, 0.89)           |
| Any NDI in survivors                                                                                                                                                                                                                                                                    | 1.30 (1.12, 1.50) | 1.39 (1.17, 1.66)   | 1,141 (52.50)                          | 828 (45.58)                               | 1.38 (1.16, 1.64)           |
| <b>IVH grade 3 vs. matched controls</b>                                                                                                                                                                                                                                                 |                   |                     |                                        |                                           |                             |
| Survival without severe NDI                                                                                                                                                                                                                                                             | 0.56 (0.45, 0.69) | 0.44 (0.33, 0.57)   | 417 (45.06)                            | 486 (60.37)                               | 0.44 (0.34, 0.57)           |
| Any NDI in survivors                                                                                                                                                                                                                                                                    | 1.86 (1.43, 2.41) | 1.94 (1.41, 2.66)   | 421 (63.07)                            | 295 (47.25)                               | 2.03 (1.49, 2.75)           |
| <b>IVH grade 4 vs. matched controls</b>                                                                                                                                                                                                                                                 |                   |                     |                                        |                                           |                             |
| Survival without severe NDI                                                                                                                                                                                                                                                             | 0.24 (0.20, 0.29) | 0.18 (0.15, 0.23)   | 410 (24.43)                            | 773 (58.83)                               | 0.18 (0.15, 0.23)           |
| Any NDI in survivors                                                                                                                                                                                                                                                                    | 5.24 (4.09, 6.72) | 6.08 (4.53, 8.15)   | 746 (82.56)                            | 473 (46.68)                               | 6.29 (4.68, 8.44)           |
| <b>Bilateral low-grade IVH<sup>a</sup> vs. matched controls</b>                                                                                                                                                                                                                         |                   |                     |                                        |                                           |                             |
| Survival without severe NDI                                                                                                                                                                                                                                                             | 0.88 (0.74, 1.05) | 0.82 (0.66, 1.02)   | 910 (60.49)                            | 804 (62.67)                               | 0.84 (0.68, 1.03)           |
| Any NDI in survivors                                                                                                                                                                                                                                                                    | 1.56 (1.28, 1.89) | 1.52 (1.20, 1.94)   | 668 (52.90)                            | 446 (43.22)                               | 1.53 (1.20, 1.94)           |
| <b>Unilateral low-grade<sup>a</sup> vs. matched controls</b>                                                                                                                                                                                                                            |                   |                     |                                        |                                           |                             |
| Survival without severe NDI                                                                                                                                                                                                                                                             | 1.30 (1.08, 1.55) | 1.22 (0.98, 1.53)   | 1,037(70.58)                           | 858 (65.78)                               | 1.20 (0.96, 1.48)           |
| Any NDI in survivors                                                                                                                                                                                                                                                                    | 0.94 (0.78, 1.13) | 0.95 (0.76, 1.19)   | 557 (42.74)                            | 484 (44.22)                               | 0.97 (0.77, 1.24)           |
| <b>Bilateral high-grade<sup>b</sup> vs. matched controls</b>                                                                                                                                                                                                                            |                   |                     |                                        |                                           |                             |
| Survival without severe NDI                                                                                                                                                                                                                                                             | 0.34 (0.28, 0.41) | 0.27 (0.21, 0.34)   | 421 (33.43)                            | 634 (59.99)                               | 0.27 (0.21, 0.35)           |
| Any NDI in survivors                                                                                                                                                                                                                                                                    | 3.44 (2.69, 4.40) | 3.83 (2.86, 5.12)   | 618 (75.32)                            | 377 (46.28)                               | 3.97 (2.97, 5.30)           |
| <b>Unilateral high-grade<sup>b</sup> vs. matched controls</b>                                                                                                                                                                                                                           |                   |                     |                                        |                                           |                             |
| Survival without severe NDI                                                                                                                                                                                                                                                             | 0.79 (0.47, 1.12) | 0.72 (0.42, 1.25)   | 130 (54.52)                            | 116 (57.89)                               | 0.90 (0.56, 1.47)           |
| Any NDI in survivors                                                                                                                                                                                                                                                                    | 2.20 (1.33, 3.55) | 2.49 (1.29, 4.65)   | 128 (66.30)                            | 82 (48.55)                                | 2.40 (1.32, 4.36)           |

a: 3,885 (70.4%) infants with low-grade IVH had laterality data available for analysis

b: 2,118 (75.4%) infants with high-grade IVH had laterality data available for analysis

| eTable 5: Survival without severe neurodevelopmental impairment by week of gestation after high-grade IVH compared to controls |                       |                 |                     |                   |                                  |                                                   |                                           |                                          |
|--------------------------------------------------------------------------------------------------------------------------------|-----------------------|-----------------|---------------------|-------------------|----------------------------------|---------------------------------------------------|-------------------------------------------|------------------------------------------|
| Gestation                                                                                                                      | High grade IVH, n (%) | Controls, n (%) | Missing data, n (%) | Crude OR (95%CI)  | Adjusted OR <sup>a</sup> (95%CI) | Absolute imputed risk after high-grade IVH, n (%) | Absolute imputed risk for controls, n (%) | Imputed adjusted OR (95%CI) <sup>b</sup> |
| 22 (n=50)                                                                                                                      | 1 (4.76)              | 5 (25.00)       | 9 (18)              | -                 | -                                | -                                                 | -                                         | -                                        |
| 23(n=804)                                                                                                                      | 40 ((11.02)           | 84 (27.18)      | 132 (16.42)         | 0.33 (0.22, 0.50) | 0.29 (0.17, 0.48)                | 51 (12.81)                                        | 110 (30.39)                               | 0.31 (0.20, 0.49)                        |
| 24 (n=1,169)                                                                                                                   | 104 (20.12)           | 196 (47.00)     | 235 (20.10)         | 0.28 (0.21, 0.38) | 0.23 (0.16, 0.33)                | 128 (21.83)                                       | 258 (50.72)                               | 0.23 (0.16, 0.32)                        |
| 25 (n=1,154)                                                                                                                   | 154 (32.77)           | 208 (61.90)     | 348 (30.16)         | 0.30 (22, 0.40)   | 0.29 (0.21, 0.41)                | 201 (35.31)                                       | 298 (64.02)                               | 0.30 (0.22, 0.42)                        |
| 26 (n=904)                                                                                                                     | 149 (41.62)           | 190 (68.84)     | 270 (29.87)         | 0.32 (0.23, 0.45) | 0.29 (0.20, 0.43)                | 199 (43.91)                                       | 261 (70.52)                               | 0.29 (0.19, 0.46)                        |
| 27 (n=707)                                                                                                                     | 123 (48.24)           | 187 (80.26)     | 219 (30.98)         | 0.23 (0.15, 0.34) | 0.20 (0.13, 0.33)                | 163 (50.08)                                       | 251 (79.98)                               | 0.23 (0.15, 0.36)                        |
| 28 (n=484)                                                                                                                     | 99 (43.23)            | 82 (75.23)      | 146 (30.17)         | 0.25 (0.15, 0.42) | 0.21 (0.11, 0.39)                | 122 (44.51)                                       | 122 (75.82)                               | 0.21 (0.11, 0.39)                        |

<sup>a</sup> Adjusted for gestation, birthweight Z score, antenatal steroids, sex, index of median deprivation quintile, smoking in pregnancy and admission neonatal operational delivery network fitted as a random effect

<sup>b</sup> Predictors of missingness used in imputed models: maternal age, index of median deprivation quintile, birth year, gestation weeks, birthweight Z score, multimorbidity, smoking in pregnancy, discharge unit level, number of previous pregnancies, breastmilk at discharge and admission neonatal operational delivery network



| eTable 6: the prevalence of additional morbidities for those with high-grade IVH, low-grade IVH and their matched controls |                   |                 |                  |                 |
|----------------------------------------------------------------------------------------------------------------------------|-------------------|-----------------|------------------|-----------------|
| Multimorbidity                                                                                                             | High-grade, n (%) | Controls, n (%) | Low-grade, n (%) | Controls, n (%) |
| Severe retinopathy of prematurity*                                                                                         | 59 (3.14)         | 32 (1.55)       | 70 (1.42)        | 35 (0.8)        |
| Respiratory support at 36 weeks*                                                                                           | 1,110 (59.14)     | 1,134 (54.97)   | 2,756 (56.04)    | 2,104 (48.12)   |
| Surgically treated necrotizing enterocolitis*                                                                              | 196 (10.44)       | 91 (4.41)       | 283 (5.75)       | 167 (3.82)      |
| Receipt of major surgery                                                                                                   | 741 (26.4)        | 418 (16.7)      | 1,043 (18.9)     | 748 (14.88)     |
| Culture positive sepsis                                                                                                    | 598 (21.29)       | 273 (10.89)     | 1,070 (19.39)    | 414 (8.24)      |
| Post-hemorrhagic ventricular dilatation                                                                                    | 366 (13.03)       | -               | 36 (0.65)        | -               |
| Ventriculoperitoneal shunt                                                                                                 | 132 (4.7)         | -               | 47 (0.85)        | -               |
| Cystic periventricular leucomalacia                                                                                        | 331 (11.78)       | -               | 188 (3.41)       | -               |
| Seizures                                                                                                                   | 360 (12.84)       | -               | 209 (3.8)        | -               |
| Perinatal stroke                                                                                                           | 5 (0.18)          | -               | 9 (0.16)         | -               |
| Central nervous system infection                                                                                           | 173 (3.25)        | -               | 152 (2.75)       | -               |

\*Major morbidities included in sub-group analysis of those who survived to 36 weeks' gestation

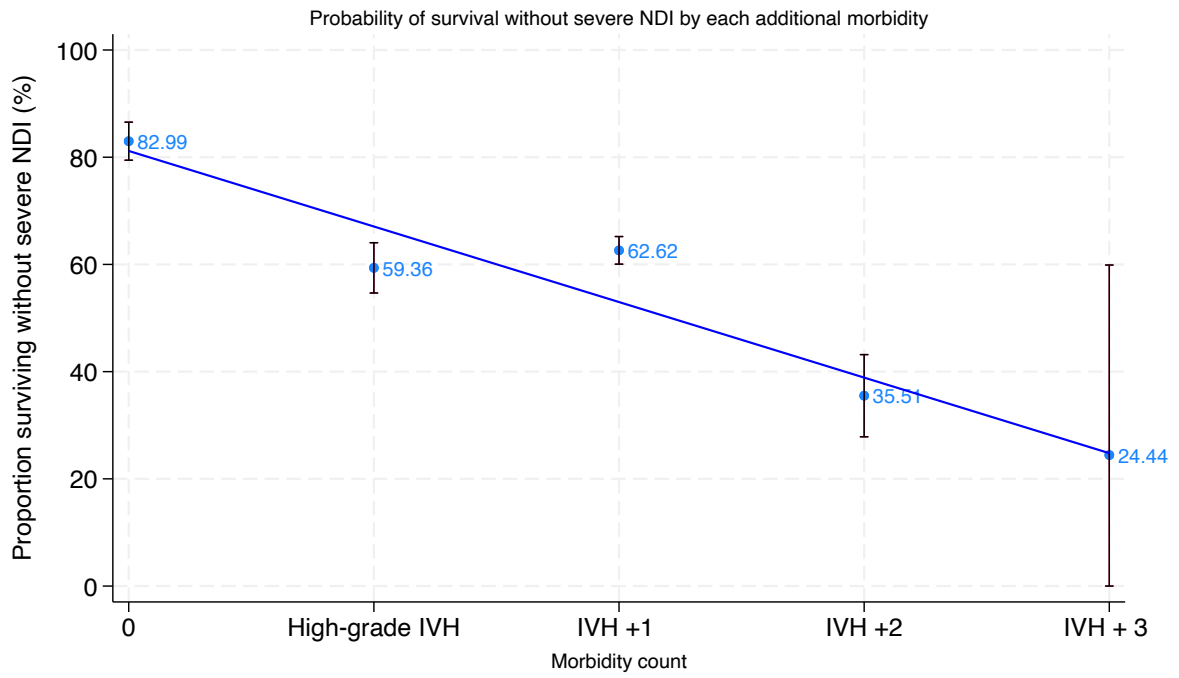

eFigure 3: graph illustrating the proportion of infants surviving without severe neurodevelopmental impairment (NDI) by increasing morbidity count

eTable 7: Estimated risk of survival without severe neurodevelopmental impairment under different missing at random (MAR) and missing not at random (MNAR) scenarios

|               | Delta | Exponential (delta) | High-grade IVH aOR (95%CI) | Low-grade IVH aOR (95%CI) |
|---------------|-------|---------------------|----------------------------|---------------------------|
| Crude         |       |                     | 0.33 (0.29, 0.38)          | 1.00 (0.91, 1.10)         |
| MAR scenario  | 0     | 1                   | 0.26 (0.22, 0.31)          | 0.90 (0.80, 1.01)         |
| MNAR scenario | -0.4  | 0.6                 | 0.27 (0.23, 0.32)          | 0.89 (0.79, 0.99)         |
|               | -0.3  | 0.7                 | 0.27 (0.22, 0.32)          | 0.89 (0.79, 0.99)         |
|               | -0.2  | 0.8                 | 0.27 (0.22, 0.32)          | 0.88 (0.79, 0.99)         |
|               | -0.1  | 0.9                 | 0.26 (0.22, 0.31)          | 0.88 (0.79, 0.99)         |
|               | 0.1   | 1.1                 | 0.26 (0.22, 0.31)          | 0.88 (0.79, 0.99)         |
|               | 0.2   | 1.2                 | 0.26 (0.22, 0.31)          | 0.88 (0.79, 0.99)         |

eTable 8: absolute imputed risk of survival without severe neurodevelopmental impairment under the missing at random (MAR) assumption and moderate missing not at random (MNAR) scenario

|                  | Absolute imputed risk in high-grade IVH, n (%) | Absolute imputed risk in matched controls, n (%) | Absolute imputed risk in low-grade IVH, n (%) | Absolute imputed risk in matched controls, n (%) |
|------------------|------------------------------------------------|--------------------------------------------------|-----------------------------------------------|--------------------------------------------------|
| MAR (delta 0)    | 861 (32.77)                                    | 1342 (59.78)                                     | 3,290 (64.41)                                 | 2,908 (65.19)                                    |
| MNAR (delta 0.6) | 827 (31.47)                                    | 1307(58.00)                                      | 3,205 (62.74)                                 | 2,834 (63.52)                                    |
