# Supplementary material for: Intraventricular Hemorrhage and Survival, Multimorbidity, and Neurodevelopment
Source: PubMed Central journal article supplement (PMC11704976; doi:10.1001/jamanetworkopen.2024.52883), 2025-01-06
Supplement: jamanetwopen-e2452883-s002.pdf [file jamanetwopen-e2452883-s002.pdf]

## Data Sharing Statement

Rees. Trends in Intraventricular Hemorrhage and Survival, Multimorbidity, and Neurodevelopment. *JAMA Netw Open*. Published January 02, 2025.  
doi:10.1001/jamanetworkopen.2024.52883

### Data

**Data available:** No
